# Supplementary material
Source: ML conference proceedings conference paper supplement (https://openreview.net/forum?id=yd5kGP5_VVE)
Supplement: supplementary_material [file attachment]

## A APPENDIX

Table 6: Details of ablation study on mixing ratio for mix-supervision based on PROMISE12.

| GT  | Noisy | Unlabeled | Dice (%)↑ | JI (%)↑ | HD(voxel)↓ | ASD (voxel)↓ |
|-----|-------|-----------|-----------|---------|------------|--------------|
| 0%  | 0%    | 100%      | 76.68     | 63.14   | 7.85       | 2.64         |
| 0%  | 25%   | 75%       | 77.70     | 63.92   | 7.31       | 2.79         |
| 25% | 0%    | 75%       | 79.02     | 65.56   | 6.93       | 2.37         |
| 0%  | 50%   | 50%       | 79.34     | 66.09   | 7.63       | 2.42         |
| 0%  | 75%   | 25%       | 80.15     | 67.00   | 7.02       | 2.52         |
| 25% | 75%   | 0%        | 80.58     | 67.68   | 7.10       | 2.25         |
| 0%  | 100%  | 0%        | 80.83     | 68.10   | 6.68       | 2.10         |

Table 7: Details of ablation study on mixing ratio for mix-supervision based on LA dataset.

| GT  | Noisy | Unlabeled | Dice (%)↑ | JI (%)↑ | HD(voxel)↓ | ASD (voxel)↓ |
|-----|-------|-----------|-----------|---------|------------|--------------|
| 0%  | 0%    | 100%      | 88.69     | 79.86   | 8.99       | 2.61         |
| 0%  | 25%   | 75%       | 88.79     | 80.10   | 9.88       | 2.87         |
| 25% | 0%    | 75%       | 88.36     | 79.44   | 8.71       | 2.61         |
| 0%  | 50%   | 50%       | 88.60     | 79.67   | 8.25       | 2.32         |
| 0%  | 75%   | 25%       | 89.28     | 80.76   | 8.61       | 2.57         |
| 25% | 75%   | 0%        | 89.51     | 81.18   | 8.15       | 2.51         |
| 0%  | 100%  | 0%        | 89.17     | 80.61   | 7.41       | 2.35         |

In this section, we give more details about the experiments setting and results. And code is publicly available at <https://anonymous.4open.science/r/MLB-Seg-C80E>.

**Ablation study on different noise levels.** We have conducted experiments on different noise levels where  $L_1$ ,  $L_2$ , and  $L_3$  represents that the corrupted ratios are around 60%, 40%, and 20% respectively. As shown in Table 8, we report the averaged dice coefficient over 5 repetitions for each series of experiments. The standard deviation for all experiments is within 0.5%. We could notice that while the noise level increases, performances of baseline drop from 80.03% to 59.77%, but performances of MLB-Seg only drop from 82.01% to 77.70% which indicates that our MLB-Seg is robust to different noisy levels and shows larger improvements under a much severer noisy situation.

**Experiments on different number of augmentations in PLE w/ and w/o mean teacher.** Table 9 shows the averaged results over 5 repetitions for each series of experiments of the number of augmentations in PLE w/ and w/o mean teacher and standard deviations are all within 0.5%. We could notice that, while increasing the augmentation number in PLE, combining with mean teacher could help stabilize model performances and even improve the results when  $Q = 4, 6$ .

**Visualization of weight map.** As shown in Fig. 4, we also display the visualization of the weight maps. The blue/purple represents for imperfect annotation/prediction in  $y^n / y^p$ . The red indicates pixels in  $w^{p*}$  have higher values. This shows that during training, the meta-learned weight maps could reassign higher values to pixels that are more accurate in pseudo labels and thus, could effectively alleviate the negative effects of imperfect pixels.

**Data augmentation details in PLE.** While applying zoom in/out in PLE at each training step, we would randomly pick a cropping or padding size from 4 to 30, denoted as  $c$  or  $p$ . Specifically, for

Table 8: Ablation study on different noise levels

| Method                 | Dice (%)↑ |
|------------------------|-----------|
| baseline - $L_1$       | 59.77     |
| <b>MLB-Seg</b> - $L_1$ | 77.70     |
| baseline - $L_2$       | 73.74     |
| <b>MLB-Seg</b> - $L_2$ | 80.83     |
| baseline - $L_3$       | 80.03     |
| <b>MLB-Seg</b> - $L_3$ | 82.01     |

Table 9: Results of different number of augmentations in PLE w/ and w/o mean teacher based on PROMISE12

| Method                     | Dice (%)↑ |
|----------------------------|-----------|
| 1 × Zoom in                | 74.34     |
| 1 × Zoom in + mean teacher | 73.94     |
| 2 × Zoom in                | 74.99     |
| 2 × Zoom in + mean teacher | 74.77     |
| 4 × Zoom in                | 72.07     |
| 4 × Zoom in + mean teacher | 76.63     |
| 6 × Zoom in                | 70.91     |
| 6 × Zoom in + mean teacher | 75.84     |

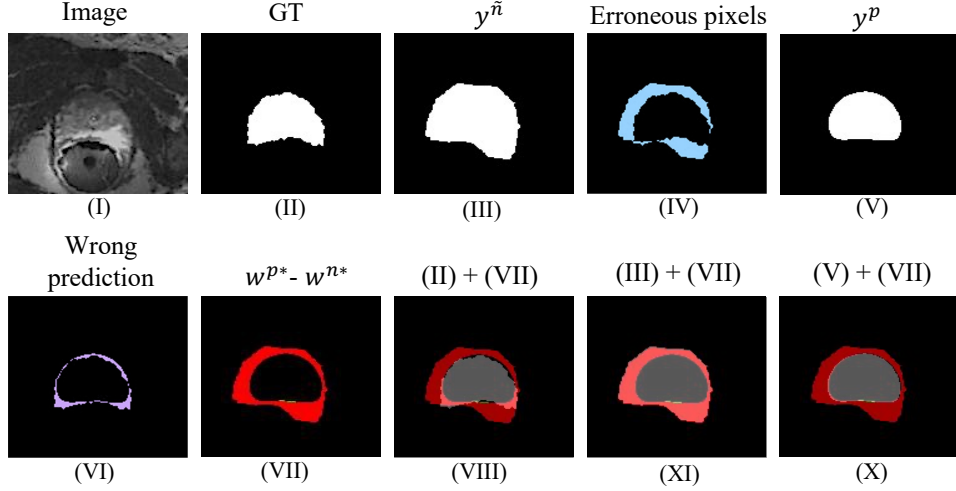

Figure 4: Weight map visualization.

zoom in, the input will first be resized to  $[144 + 2 * c, 144 + 2 * c]$  and then center cropped to the size of  $[144, 144]$ . As for zoom out, the input will first be resized to  $[144 - 2 * p, 144 - 2 * p]$ , and then be zero padding to  $[144, 144]$ . As for flip, we use horizontally, vertically, or horizontally and vertically flip with a possibility of  $\frac{1}{3}$  for each flip type.

**More training details on meta-learning.** For meta-learning, we apply SGD to optimize network parameters with a learning rate at 0.005 and the decay in the learning rate is at  $\frac{20}{20+epoch}$ . Under the setting of  $4 \times$  PLE w/ or w/o mean teacher, we set 1 as the batch size for the imperfect training data and 2 for the clean data used in the meta-update process. For  $2 \times$  PLE w/ or w/o mean teacher, we use 2 and 4 as the batch size for the imperfect and clean data respectively. For MLB without PLE strategy, we use 4 as the batch size for both imperfect and clean data. And during the meta-update process, we also apply the same PLE strategy used in the imperfect training data to the clean data. and in each experiment, we train the network for 100 epochs.

**More details on synthesizing noisy annotations.** For each ground-truth label, we discard labels of small size and set them all zero. Then we apply random rotation to the target. Rotation degree is randomly selected from  $-20^\circ$  to  $20^\circ$ . Then we randomly apply erosion or dilation with a possibility of 0.5 for each operation.

**More examples of the averaged meta-learned weights w/ and w/o mean teacher.** To further show the instability using MLB-Seg w/o mean teacher and the benefit of MLB-Seg w/ mean teacher while increasing augmentation numbers for PLE, we show more examples in Fig 5. And Results are acquired using fixed networks and applying augmentations multiple times of meta-update respectively.

**Examples of the corrupted noisy labels.** In Fig 6, we give some examples of the corrupted noisy labels (the second row) and its corresponding ground-truth labels (the first row). They are generated using a combination of random rotation, erosion or dilation, following ??.

**Limitations and social impact.** Our proposed MLB-Seg could be a very effective method for medical image segmentation under imperfect supervision (*e.g.*, semi- and noisy-supervision) which is quite common in the real world. Future work needs to address different types of imperfect supervision including weak supervision (*e.g.*, bounding boxes), etc. Besides, given that there are currently no real-world noisy medical image segmentation benchmarks publicly accessible, our experiments are only conducted on the datasets with synthesized noisy annotations. And more experiments should be done on the different real-world noisy datasets to further evaluate the robustness of MLB-Seg.

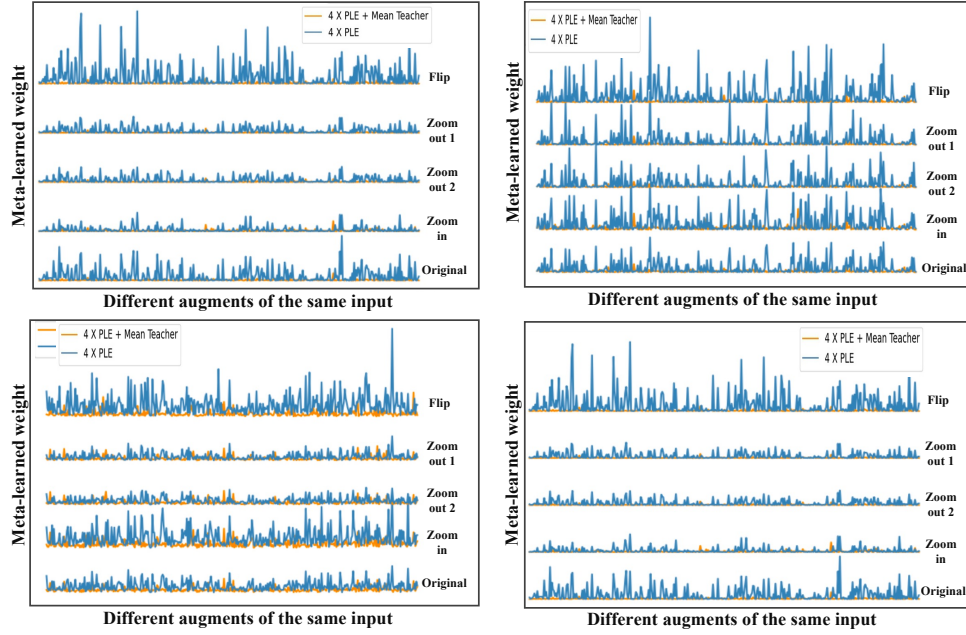

Figure 5: Average meta-learned weights of augmented variants w/ and w/o mean teacher. Blue line represents the average meta-learned weights of different augmented samples from one sample while using  $4 \times$  PLE and orange line represents using  $4 \times$  PLE w/ mean teacher.

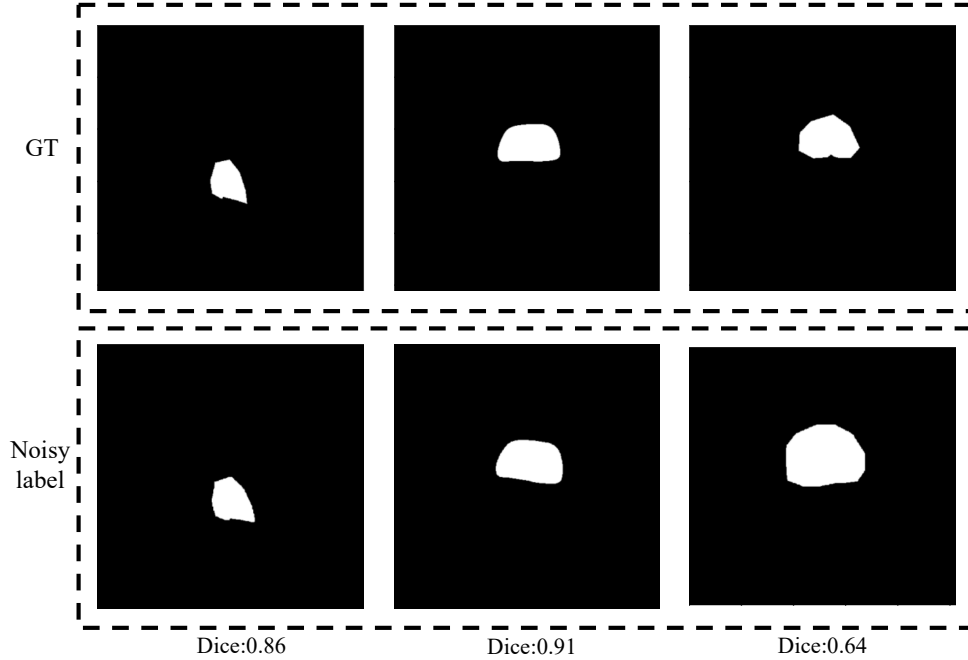

Figure 6: Examples of the corrupted noisy labels.
